# Supplementary material for: Synthesis of novel yttrium-doped graphene oxide nanocomposite for dye removal
Source: Royal Society of Chemistry journal article supplement (doi:10.1039/c4ta01057d), 2014-01-01

## Supplementary material

### Synthesis of novel Yttrium-doped graphene oxide nanocomposite for dye removal

Ya Zhang<sup>1\*</sup>, Saisai Yuan<sup>2</sup>, Yanhua Zhao<sup>1</sup>, Honggui Wang<sup>1</sup>, Chenda He<sup>1\*</sup>

*1. Jiangsu Key Laboratory of Environmental Material and Engineering, School of Environmental Science and Engineering, Yangzhou University, Yangzhou, 225127, P.R. China.*

*2. School of Chemistry and Chemical Engineering, Yangzhou University, Yangzhou, 225009, P.R. China*

---

\* Corresponding author. Tel: +86-514-87979528; E-mail address: zhangya@yzu.edu.cn (Y. Zhang), hed@yzu.edu.cn (C.D. He).

Figure S1. Comparison of photodegradation efficiency using as-synthesized GO,  $Y_2O_3$  and 5 GOY composite. MB concentration: 25 ppm (before adsorption), pH = 4.1. Dosage: 8 mg.

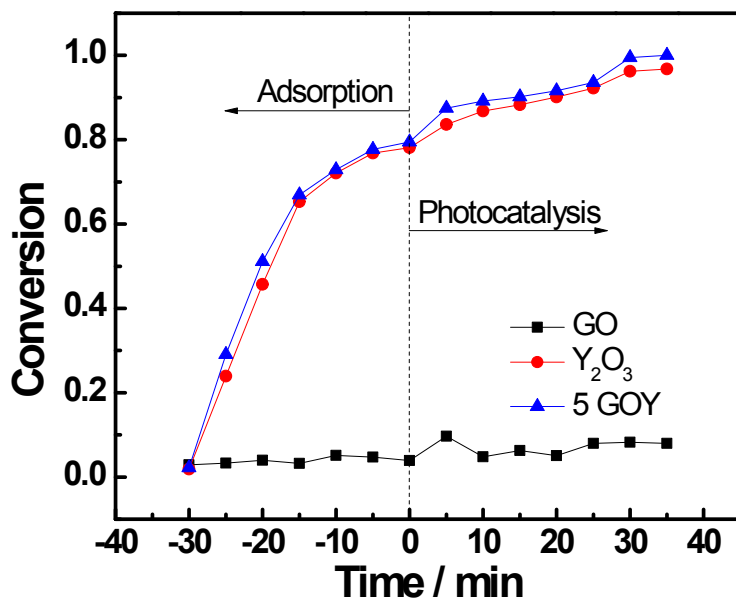

Figure S2. O1s spectra of  $Y_2O_3$  (A) and 5 GOY (B).

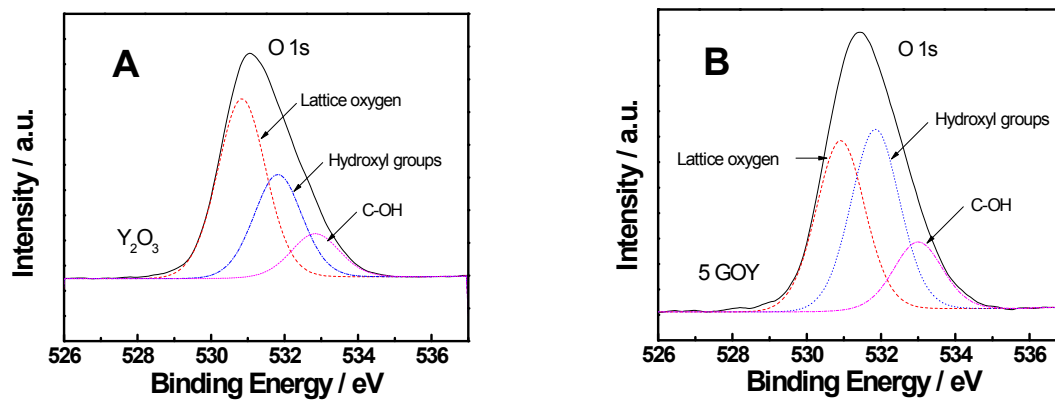

Table S1 Oxygen Composition (in at.%) of  $Y_2O_3$  and 5 GOY samples at different states

| Samples  | O 1s Scan A | O 1s Scan B | O 1s Scan C |
|----------|-------------|-------------|-------------|
|          | ~530.9 eV   | ~531.8 eV   | ~533.0 eV   |
| $Y_2O_3$ | 30.93       | 16.75       | 7.45        |
| 5 GOY    | 18.12       | 19.92       | 7.12        |

Figure S3. Comparison of photodegradation efficiency using as-synthesized 5 GOY and TiO<sub>2</sub> P25. MB concentration: 25 ppm (before adsorption), pH = 4.1.

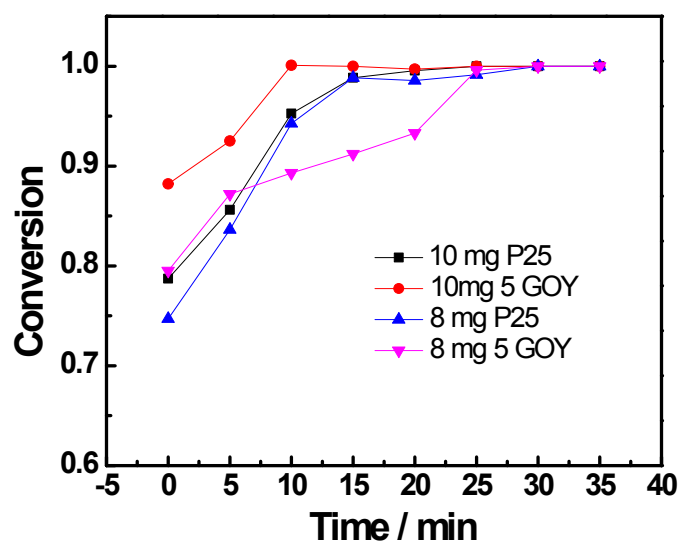

Supplement: c4ta01057d1.pdf [file c4ta01057d1.pdf]
